# Supplementary material
Source: publisher site journal article supplement (https://www.spandidos-publications.com/4602/downloadSupplementary)
Supplement: Supplementary file 1 [file downloadSupplementary]

## Sheet: GeneSymbol
Table SVII. Upregulated miRNAs
All targets
ACOT11
ADAT2
AFF1
ASIC4
BAG4
C20orf194
C3orf62
C9orf171
CCDC107
CCL21
CDC42EP4
CDC42SE1
CHD2
CYP2U1
DCTN3
DNAJB1
EFCAB6
EPT1
FBLN5
FBXO28
FCGR3A
FCGR3B
FTSJ2
GPR62
GTF2IRD2
GUCD1
GYPC
HDAC4
HDDC2
HMGXB3
IL25
IVD
KCNK10
MED20
NKAPL
NT5C1B
NT5C1B-RDH14
OPN3
ORC5
RAP1GDS1
RFX7
RUNX1T1
RUVBL1
S100A2
SCN5A
SERINC4
SGCZ
SLAMF6
SLC48A1
SMO
SNF8
SOX12
SPTSSB
SRSF6
TADA1
TMC8
TMEM154
TMEM40
UBXN10
VDAC2
VPS52
VSTM2L
WDR82
YWHAH
ZC2HC1C
ZCCHC17
ZMYM6NB
ZNF605
AEBP2
ATF2
C11orf30
CDKN2D
GK
MEF2D
MIF
OSR1
PMM2
PSMB8
S1PR2
SAMD4B
TBX1
TSC1
VAPA
YWHAZ
ADAM12
ADAMTS3
ADCY2
AHR
ANP32E
ATXN1
B4GALT5
BCL7A
CBLL1
CDH5
CDK6
CIT
CLDN11
CLIC4
COL10A1
COX7C
CSDE1
DCUN1D5
DOK6
ELAVL2
ESRRG
EVX2
EXOC5
FBN2
HMGCS1
HOXC11
HOXD10
ITGB3BP
KCNA1
KCTD9
KIAA0408
KPNA4
KRAS
LIN7C
LMX1A
MARCKS
MYCN
MYNN
NAP1L5
OGT
OLR1
PEG10
PHOX2B
POU3F1
PPP2R2C
PPP2R5E
PPP4R2
PSMD11
PTPRF
RAI14
RAP1A
RBMS1
RCC2
REEP5
RNF144A
RPRD1B
SAMD12
SCN2B
SEC63
SEMA3C
SHPRH
SLA2
SNX13
SPOCK1
STIM2
STRN
TARDBP
TMEM198
TSHZ3
TSPAN4
UBE2E2
UBE2H
ZBTB43
ZEB2
ZFHX4
ZMYM4
ZRANB2
CAPZB
HSD3B7
ISL1
KCNB1
KCNN3
KPNA1
NPTN
NXF1
PRRX1
RPL28
TNRC6A
TP53
UBE2I
ABCB9
ABCC10
ABCC5
ABHD17C
ACAP3
ACER2
ACPP
ACSL6
ACVR1C
ADAM15
ADAMTS15
ADAMTS5
ADAMTS8
ADIPOR2
ADRB1
ADRB2
ADRB3
AEN
AFF2
AGO3
AGO4
AGPAT6
AGPAT9
AHCTF1
AIFM1
AKAP6
ALKBH1
AMER3
AMOT
AMT
ANGPTL2
ANKRD46
AP1S1
APBA1
APBB3
APPBP2
ARG2
ARHGAP20
ARHGAP28
ARHGEF15
ARHGEF38
ARHGEF7
ARID3A
ARID3B
ARL4D
ARL5A
ARL6IP6
ARRDC4
ASAP1
ATG16L1
ATP2A2
ATP8B4
ATPAF1
ATXN7L3B
B3GNT7
BACE2
BACH1
BCAP29
BCAT1
BCL2L1
BEGAIN
BEND4
BIN3
BLOC1S5
BLOC1S6
BMP5
BRWD3
BSND
BTBD9
BTF3L4
BTG2
BZW1
BZW2
C11orf84
C15orf39
C15orf41
C19orf47
C2orf88
C3orf52
C5orf51
C8orf58
CACFD1
CACNB4
CACNG4
CADM2
CALM1
CALN1
CANT1
CAPN3
CASKIN1
CASP3
CASP5
CBX2
CCDC144A
CCDC71L
CCL3
CCL3L1
CCL3L3
CCL7
CCND1
CCNF
CCNJ
CCNJL
CCNY
CCR7
CCSAP
CD200R1
CD86
CDC25A
CDC34
CDCA8
CDH22
CDKN1A
CDV3
CEBPD
CECR6
CEP135
CEP164
CERCAM
CFL2
CHD7
CHRD
CHRNA7
CHSY3
CHUK
CLASP2
CLDN12
CLP1
CNTRL
COIL
COL14A1
COL15A1
COL1A1
COL1A2
COL24A1
COL27A1
COL4A2
COL4A6
COL9A1
COL9A3
CPA4
CPD
CPEB1
CPEB2
CPEB4
CPED1
CPSF4
CRCT1
CRK
CRTAP
CRY2
CSRNP3
CTDSPL2
CTNS
CTPS1
CXorf36
CYB561D1
CYP19A1
CYP46A1
DAGLA
DAPK1
DCAF15
DCUN1D2
DDI2
DDX19A
DDX19B
DDX26B
DHX57
DIAPH2
DKK3
DLGAP4
DLST
DMP1
DNAJB9
DPF2
DPH1
DPH3
DPP3
DPYSL3
DTX2
DTX4
DUSP1
DUSP16
DUSP22
DUSP4
DUSP9
DYRK1A
E2F2
E2F5
E2F6
EDEM3
EDN1
EEA1
EEF2K
EFHD2
EGLN2
EIF4G2
ELF4
ELOVL4
EMB
EOGT
EPHA3
EPHA4
ERCC4
ERGIC1
ESPL1
ETNK2
ETV3
FAM103A1
FAM118A
FAM135A
FAM189A1
FAM214B
FAM222B
FAS
FASLG
FBXO32
FIGN
FKRP
FNIP1
FNIP2
FOXP2
FRMD4B
FSD2
FZD3
FZD4
GABRA6
GALC
GALE
GALNT1
GALNT15
GALNT2
GAN
GAS7
GATM
GCNT4
GDF6
GDPD1
GEMIN7
GHR
GIPC1
GK5
GLRX
GNAL
GNG5
GNPTAB
GOLGA4
GOLGA7
GPATCH3
GPCPD1
GPR132
GPR137
GPR156
GPR157
GPR26
GPR61
GPR63
GREB1L
GRID2IP
GRPEL2
GSG1L
GTF2I
GXYLT1
GYG2
HABP4
HAND1
HAS2
HBEGF
HDX
HECTD2
HIC1
HIC2
HIF3A
HMGA1
HMGA2
HOOK1
HOXA1
HOXB1
HOXD1
HS2ST1
HSPE1-MOB4
HTR1E
ICMT
ICOS
IDH2
IGDCC3
IGDCC4
IGF1R
IGF2BP1
IGF2BP2
IGF2BP3
IGLON5
IGSF1
IKBKAP
IKBKE
IL10
IL13
IMPG2
INPP5A
INSR
IQCB1
IRS2
ISLR
ITGB3
ITGB8
KCNC1
KCNC2
KCNJ11
KCNJ3
KCNQ4
KCTD10
KCTD16
KCTD17
KCTD21
KDM3A
KIAA1161
KIAA1958
KIAA2022
KIF2A
KLF9
KLHDC8B
KLHL13
KLHL23
KLHL31
KLK10
KPNA5
KREMEN1
LBH
LBR
LCOR
LDB1
LGR4
LIMD1
LIMD2
LIMK2
LIN28A
LIN28B
LINGO1
LIPH
LIPT2
LOR
LOXL4
LPGAT1
LRIG2
LRIG3
LRRC20
LRRC8B
LSM11
LUC7L3
LYVE1
MAP3K1
MAP3K13
MAP3K2
MAP4K3
MAPK6
MARCH9
MARS2
MBTPS2
MDM4
MED28
MED6
MED8
MEIS2
MESDC1
MFSD4
MGA
MIB1
MIEF1
MIOS
MLLT10
MMP11
MOB4
MSN
MTUS1
MXD1
MYCBP
MYO1F
NAA20
NAT8L
NDST2
NEFM
NEK3
NEK9
NGF
NHLRC3
NID2
NIPAL4
NKD1
NKIRAS2
NME4
NME6
NOVA1
NPEPL1
NR6A1
NRAS
NRK
NSMCE2
NXT2
OSBPL3
OSMR
OSTF1
P2RX1
P4HA2
PALD1
PALM3
PANX2
PAPPA
PARD6B
PARM1
PARP8
PBX1
PBX2
PBX3
PCDH19
PCDH20
PCGF3
PCTP
PDE12
PDGFB
PDHB
PDP2
PDPR
PEX11B
PGRMC1
PI4K2B
PIAS4
PIGA
PIGU
PITPNM3
PKIA
PKN2
PLA2G15
PLA2G3
PLD3
PLEKHA8
PLEKHG7
PLEKHH1
PLEKHO1
PLXNC1
PLXND1
PMAIP1
POGZ
POLR2D
POTEG
POTEM
POU6F2
PPAPDC2
PPARGC1B
PPP1R16B
PPP2R2A
PPP3CA
PQLC2
PRDM1
PRDM5
PRKAA2
PRKAB2
PRKAR2A
PRPF38B
PRR18
PRSS22
PSORS1C2
PTAFR
PTPRU
PXMP4
PXT1
QARS
RAB11FIP4
RAB15
RAB40C
RAG1
RALB
RASGRP1
RASL10B
RB1
RBFOX2
RCN1
RDH10
RDX
RFX6
RGAG1
RGS16
RGS17
RICTOR
RIOK3
RNF165
RNF20
RNF38
RNF44
RNF7
RNFT1
RORC
RPUSD2
RRM2
RRP1B
RSPO2
RTCA
RUFY3
S100A8
SALL3
SALL4
SBK1
SCD
SCN4B
SCYL3
SEC14L1
SEC16B
SEC31B
SECISBP2L
SEMA4C
SEMA4G
SENP2
SENP5
SH2B3
SKIDA1
SKIL
SLC12A9
SLC16A10
SLC1A4
SLC20A1
SLC25A18
SLC25A24
SLC25A27
SLC25A32
SLC25A4
SLC2A12
SLC30A1
SLC30A4
SLC30A6
SLC35D2
SLC4A4
SLC52A3
SLC5A6
SLC5A9
SLC6A1
SLC6A15
SLC6A5
SLC8A2
SLC9A9
SMARCAD1
SMC1A
SMCR8
SMIM3
SMUG1
SNAP23
SNN
SNX30
SOCS1
SOCS4
SOX13
SP8
SPIRE1
SPRED3
SPRYD4
SREK1IP1
ST3GAL1
STAB2
STARD3NL
STEAP3
STK40
STOX2
STRBP
STX17
STX3
SUCLG2
SULF2
SURF4
SWT1
SYNCRIP
SYT1
SYT2
TAB2
TARBP2
TBKBP1
TBX5
TEAD3
TECPR2
TET3
TGDS
TGFBR1
TGFBR3
THAP9
THBS1
THRA
THRSP
TIMM17B
TMC7
TMEM110
TMEM143
TMEM2
TMEM234
TMEM255A
TMEM26
TMEM41A
TMEM65
TMOD2
TMPPE
TMPRSS2
TNFRSF1B
TNFSF9
TNIK
TRABD
TRANK1
TRIB1
TRIM17
TRIM41
TRIM71
TSC22D2
TSPAN18
TSPEAR
TTC31
TTL
TTLL4
TXLNA
UBE2G2
UFM1
UGCG
UHRF2
ULK2
USP21
USP38
USP44
USP47
USP6
UTRN
VASH2
VAV3
VGLL3
VPS26B
VSNL1
VSTM5
WARS2
WASL
WDR37
WNK3
WNT9A
WNT9B
XK
XKR4
XKR7
XKR8
XRN1
YBX2
YOD1
YPEL2
YY1
ZBTB16
ZBTB26
ZBTB39
ZBTB5
ZBTB8B
ZC3H10
ZC3H3
ZC3HAV1L
ZCCHC3
ZFYVE26
ZNF10
ZNF200
ZNF202
ZNF275
ZNF280B
ZNF341
ZNF391
ZNF451
ZNF473
ZNF512B
ZNF516
ZNF583
ZNF641
ZNF689
ZNF697
ZNF70
ZNF710
ZNF774
ZNF784
ZNF879
ZPLD1

## Sheet: Detail
Dataset: up-miRNAs( ID type: miRNA Product, Count: 6)
Targets found: 850
miRNA Product	Target genes
hsa-miR-370-3p	ACOT11; ADAT2; AFF1; ASIC4; BAG4; C20orf194; C3orf62; C9orf171; CCDC107; CCL21; CDC42EP4; CDC42SE1; CHD2; CYP2U1; DCTN3; DNAJB1; EFCAB6; EPT1; FBLN5; FBXO28; FCGR3A; FCGR3B; FTSJ2; GPR62; GTF2IRD2; GUCD1; GYPC; HDAC4; HDDC2; HMGXB3; IL25; IVD; KCNK10; MED20; NKAPL; NT5C1B; NT5C1B-RDH14; OPN3; ORC5; RAP1GDS1; RFX7; RUNX1T1; RUVBL1; S100A2; SCN5A; SERINC4; SGCZ; SLAMF6; SLC48A1; SMO; SNF8; SOX12; S…
hsa-miR-451a	AEBP2; ATF2; C11orf30; CDKN2D; GK; MEF2D; MIF; OSR1; PMM2; PSMB8; S1PR2; SAMD4B; TBX1; TSC1; VAPA; YWHAZ;
hsa-miR-501-3p	ADAM12; ADAMTS3; ADCY2; AHR; ANP32E; ATXN1; B4GALT5; BCL7A; CBLL1; CDH5; CDK6; CIT; CLDN11; CLIC4; COL10A1; COX7C; CSDE1; DCUN1D5; DOK6; ELAVL2; ESRRG; EVX2; EXOC5; FBN2; HMGCS1; HOXC11; HOXD10; ITGB3BP; KCNA1; KCTD9; KIAA0408; KPNA4; KRAS; LIN7C; LMX1A; MARCKS; MYCN; MYNN; NAP1L5; OGT; OLR1; PEG10; PHOX2B; POU3F1; PPP2R2C; PPP2R5E; PPP4R2; PSMD11; PTPRF; RAI14; RAP1A; RBMS1; RCC2; REEP5; RNF144A…
hsa-miR-1307-3p	-
hsa-miR-652-3p	CAPZB; HSD3B7; ISL1; KCNB1; KCNN3; KPNA1; NPTN; NXF1; PRRX1; RPL28; TNRC6A; TP53; UBE2I;
hsa-let-7b-5p	ABCB9; ABCC10; ABCC5; ABHD17C; ACAP3; ACER2; ACPP; ACSL6; ACVR1C; ADAM15; ADAMTS15; ADAMTS5; ADAMTS8; ADIPOR2; ADRB1; ADRB2; ADRB3; AEN; AFF2; AGO3; AGO4; AGPAT6; AGPAT9; AHCTF1; AIFM1; AKAP6; ALKBH1; AMER3; AMOT; AMT; ANGPTL2; ANKRD46; AP1S1; APBA1; APBB3; APPBP2; ARG2; ARHGAP20; ARHGAP28; ARHGEF15; ARHGEF38; ARHGEF7; ARID3A; ARID3B; ARL4D; ARL5A; ARL6IP6; ARRDC4; ASAP1; ATG16L1; ATP2A2; ATP8B4;…
